# Supplementary material for: Effects of PACK guide training on the management of asthma and chronic obstructive pulmonary disease by primary care clinicians: a pragmatic cluster randomised controlled trial in Florianópolis, Brazil
Source: PubMed Central journal article supplement — BMJ Glob Health. 2019 Dec 16;4(6):e001921. doi: 10.1136/bmjgh-2019-001921 (PMC6936566; doi:10.1136/bmjgh-2019-001921), 2019-12-16
Supplement: bmjgh-2019-001921supp001.pdf [file bmjgh-2019-001921supp001.pdf]

**Abstrat - Portuguese (Brazil)**

**Introdução:** O guia de Abordagem Prática do Kit de Cuidados em Saúde (PACK) foi adaptado para o sistema de saúde do Brasil; médicos e enfermeiros da atenção primária foram treinados para usá-lo na prática clínica.

**Métodos:** Vinte e quatro unidades básicas de saúde (UBS) municipais de Florianópolis foram alocadas aleatoriamente para receber treinamento nas UBS utilizando o guia, e 24 foram alocadas para receber apenas o guia. Foram analisados dados de 6.666 pacientes adultos com asma ou doença pulmonar obstrutiva crônica (DPOC) e os desfechos foram medidos por doze meses, através de registros médicos eletrônicos. Os resultados principais foram escores compostos de mudança no tratamento, realização de espirometria e taxas de novos diagnósticos de asma e DPOC.

**Resultados:** os escores de asma em 2437 participantes do grupo de intervenção foram maiores (74,8%, 20,4% e 4,8% com escores de 0, 1 e 2 respectivamente) do que em 2633 participantes do grupo controle (80,0%, 16,8% e 3,2%) (odds ratio (OR) para pontuação mais alta 1,32, intervalo de confiança de 95% (IC) 1,08-1,61,  $p = 0,006$ ). Ajustado para os escores de asma registrados em cada clínica antes do início do treinamento, o OR foi de 1,24 (IC 95% 1,03-1,50,  $p = 0,022$ ). Os escores da DPOC em 1371 participantes do grupo de intervenção (77,7%, 17,9% e 4,3% com escores de 0, 1 e 2) não diferiram dos de 1181 participantes do grupo controle (80,5%, 15,8% e 3,7%) (OR 1,21 (IC95% 0,94-1,55,  $p = 0,142$ ). As taxas de novos diagnósticos de asma e DPOC, internação hospitalar e indicadores de diagnóstico e tratamento de co-morbidades cardiovasculares, diabetes, depressão e cessação do tabagismo não diferiram entre os grupos experimentais.

**Conclusão:** O treinamento com PACK aumentou o tratamento baseado em diretrizes e espirometria para asma, mas não afetou as co-morbidades em DPOC ou as taxas de diagnóstico.
